# Supplementary material for: Preoperative Malnutrition and Metabolic Markers May Predict Periprosthetic Fractures in Total Hip Arthroplasty
Source: PubMed Central journal article supplement — Arthroplast Today. 2023 Jan 16;19:101093. doi: 10.1016/j.artd.2022.101093 (PMC9860454; doi:10.1016/j.artd.2022.101093), 2023-01-16
Supplement: mmc5.pdf [file mmc5.pdf]

# CONFLICT OF INTEREST STATEMENT

## *American Association of Hip and Knee Surgeons*

(Adopted from the American Academy of Orthopaedic Surgeons disclosure statement)

The following form **must be filled out completely and submitted by each author (example, 6 authors, 6 forms).**  
**All items require a response. If there is no relevant disclosure for a given item, enter "None."**

Manuscript Title: Preoperative Malnutrition and Metabolic Markers may Help Predict Postoperative Periprosthetic  
Fractures in Total Hip Arthroplasty

---

1. Royalties from a company or supplier (The following conflicts were disclosed)

Innomed

2. Speakers bureau/paid presentations for a company or supplier (The following conflicts were disclosed)

None

3A. Paid employee for a company or supplier (The following conflicts were disclosed)

None

3B. Paid consultant for a company or supplier (The following conflicts were disclosed)

None

3C. Unpaid consultants for a company or supplier (The following conflicts were disclosed)

None

4. Stock or stock options in a company or supplier (The following conflicts were disclosed)

None

5. Research support from a company or supplier as a Principal Investigator (The following conflicts were disclosed)

None

6. Other financial or material support from a company or supplier (The following conflicts were disclosed)

None

7. Royalties, financial or material support from publishers (The following conflicts were disclosed)

None

8. Medical/Orthopaedic publications editorial/governing board (The following conflicts were disclosed)

None

9. Board member/committee appointments for a society (The following conflicts were disclosed)

None

**Each author must sign AND print or type his/her name, date and submit a separate form**

In addition, one BLINDED Conflict of Interest form (no author names used) should be submitted per manuscript with all author disclosures.

|                             |                                                                                   |         |
|-----------------------------|-----------------------------------------------------------------------------------|---------|
| William McMaster            |  | 6/19/22 |
| Author Name (Print or Type) | Author Signature                                                                  | Date    |
